# Supplementary material for: Unravelling the potential of disposable and modifiable pencils as catalyst supports for hydrogen evolution reaction
Source: Royal Society of Chemistry journal article supplement (doi:10.1039/d2nj03359c), 2022-01-01
Supplement: d2nj03359c1.pdf [file d2nj03359c1.pdf]

## Supplementary Material for New Journal of Chemistry

### Unravelling the Potential of Disposable and modifiable Pencils as Catalyst Supports for Hydrogen Evolution Reaction

Mohan Paudel,<sup>1</sup> Braydan Daniels,<sup>2</sup> Amanda M. Arts,<sup>2</sup> Alexander Gupta<sup>2,3</sup>, Theodore Kalbfleisch,<sup>2</sup> Dillon T. Hofsommer,<sup>1</sup> Craig A. Grapperhaus,<sup>1\*</sup> Robert M. Buchanan<sup>1\*</sup>, Gautam Gupta<sup>2\*</sup>

<sup>1</sup>Department of Chemistry, <sup>2</sup>Department of Chemical Engineering, University of Louisville, Louisville, Kentucky 40292, United States.

<sup>3</sup>Los Alamos National Laboratory, Los Alamos, New Mexico 87545, United States

#### Table of Contents:

|                                                                                                                                                                                                                                     |    |
|-------------------------------------------------------------------------------------------------------------------------------------------------------------------------------------------------------------------------------------|----|
| Figure S1. FT-IR spectra and XRD spectra of different carbon electrodes.....                                                                                                                                                        | 2  |
| Figure S2. FT-IR spectrum of Ni-ATSM and UV-visible spectra of Ni-ATSM in acetonitrile....                                                                                                                                          | 3  |
| Figure S3. <sup>1</sup> H NMR of Ni-ATSM in DMSO-D <sub>6</sub> .....                                                                                                                                                               | 4  |
| Table S1. Tafel slope and overpotential of different carbon substrates at -10 mA/cm <sup>2</sup> .....                                                                                                                              | 4  |
| Figure S4. Cyclic voltammograms for carbon supports in 0.5 M H <sub>2</sub> SO <sub>4</sub> from -0.1 to -1.0 V vs RHE (left) and for GCE, CPE, and HB pencil from 0 to -0.5 V in 0.5 M H <sub>2</sub> SO <sub>4</sub> (right)..... | 5  |
| Figure S5. Nyquist plot of different grade of pencils in comparison with glassy carbon electrode.....                                                                                                                               | 5  |
| Figure S6. LSV plot of different surface of pencils generated using table saw in 0.5 M H <sub>2</sub> SO <sub>4</sub> from -0.1 to -0.8 V vs RHE.....                                                                               | 5  |
| Figure S7. LSV of pencil surface and GCE surface after each 300 reductive cycling.....                                                                                                                                              | 6  |
| Figure S8. SEM image of pencil before and after 1000 reductive cycling.....                                                                                                                                                         | 6  |
| Figure S9. LSV and Tafel plots of the the carbon supports, GCE, CPE, and HB with and without catalyst.....                                                                                                                          | 7  |
| Figure S10. Cyclic voltammograms for Ni-ATSM on GCE, CPE, and HB pencil in 0.5 M H <sub>2</sub> SO <sub>4</sub> from -0.1 to -0.8 V vs RHE at a scan rate of 100 mV/s. ....                                                         | 8  |
| Table S2. Tafel slope and overpotential (at -10 mA/cm <sup>2</sup> ) of catalyst loaded carbon surfaces.....                                                                                                                        | 8  |
| Figure S11. IR spectra of wax obtained from HB pencil by acetone extraction compared to candle wax.....                                                                                                                             | 8  |
| Figure S12. Nyquist plots for the HB Pencil Before and after etching.....                                                                                                                                                           | 9  |
| Table S3. Calculation of relative surface area of acetone etched pencil.....                                                                                                                                                        | 10 |
| Figure S13. LSV catalyst modified pencil and surface area corrected acetone etched pencil with catalyst.....                                                                                                                        | 10 |
| Figure S14. Reproducibility test of acetone etched pencil.....                                                                                                                                                                      | 11 |
| Figure S15. Chronopotentiometry of etched pencil, catalyst modified etched pencil, and platinum.....                                                                                                                                | 11 |
| Table S4. Faradaic efficiency of platinum, acetone etched pencil and catalyst modified acetone etched pencil for HER.....                                                                                                           | 11 |

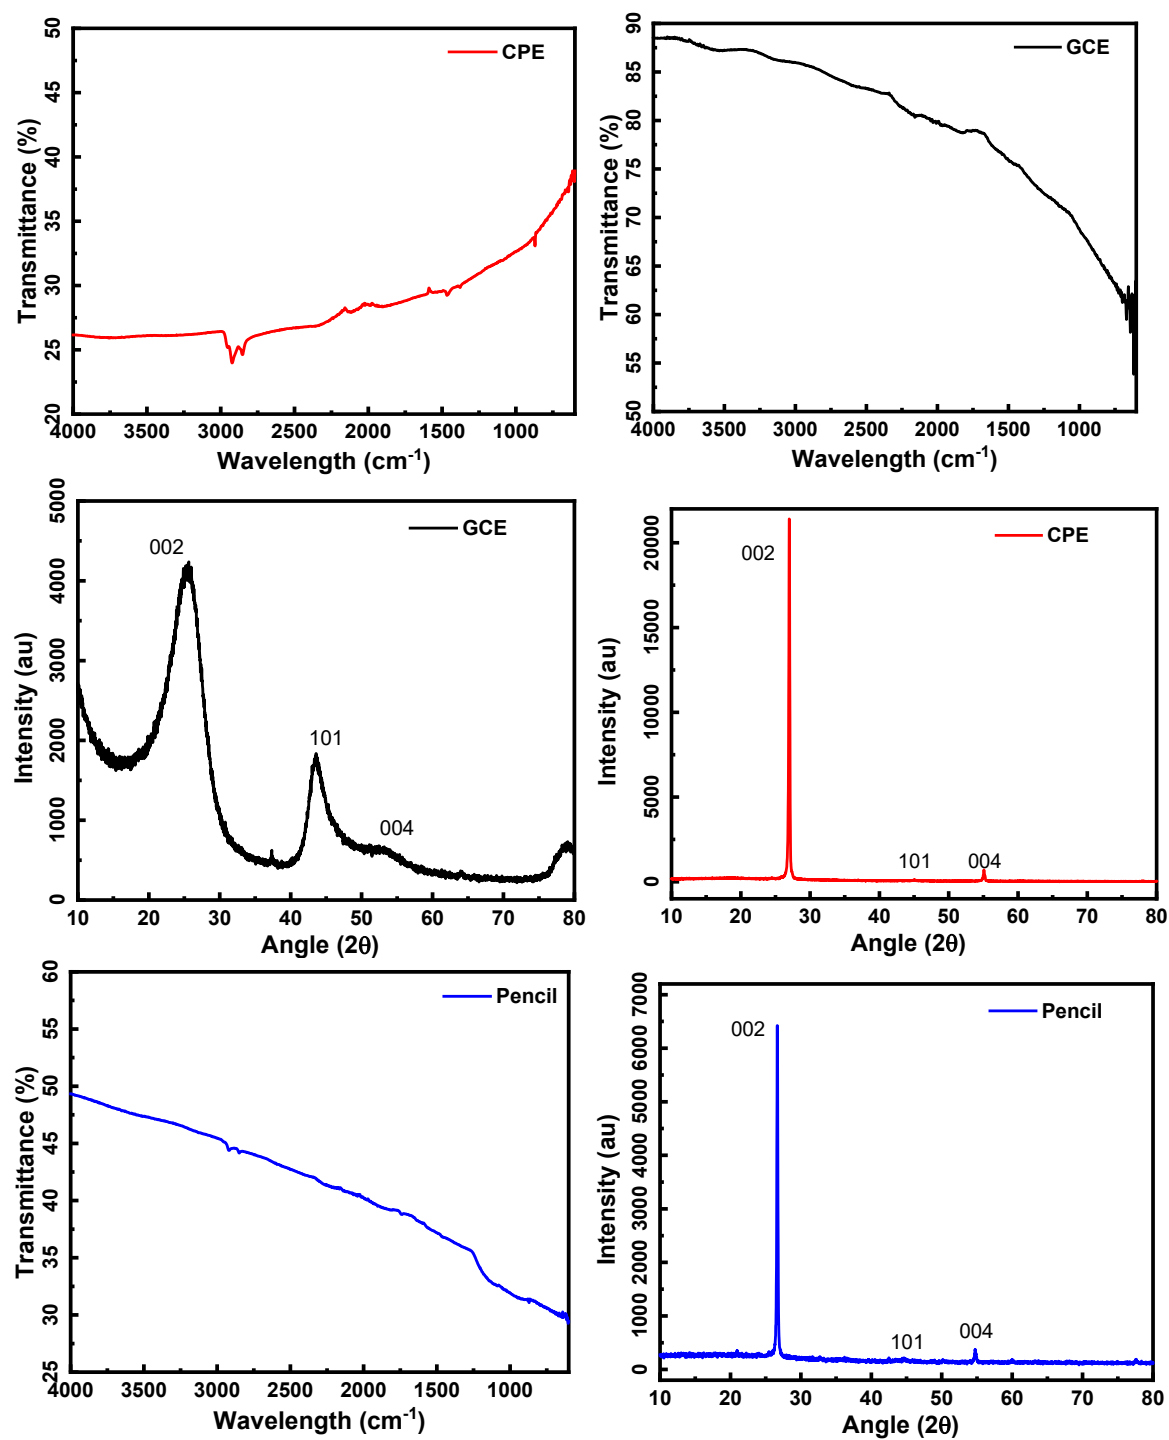

Figure S1. FT-IR spectra (left) and XRD (right) of different carbon electrodes.

The infrared spectrum (Figure S1a) shows a sharp N-H stretch at  $3343\text{ cm}^{-1}$  and C=N stretch at  $1574\text{ cm}^{-1}$ , consistent with previously reported literature values. Two distinct absorption bands are observed in UV-visible spectrum of the catalyst (Figure S1b), one intense ligand-to-ligand charge transfer band at  $257\text{ nm}$  and another ligand-to-metal charge transfer band at  $398\text{ nm}$ . Figure S2 shows the  $^1\text{H}$  NMR spectrum of Ni-ATSM in DMSO- $\text{D}_6$ . The spectrum shows three characteristic peaks at  $7.68\text{ ppm}$ ,  $2.78\text{ ppm}$  and  $1.94\text{ ppm}$  for NH protons, pendant methyl protons and the backbone methyl protons, respectively.

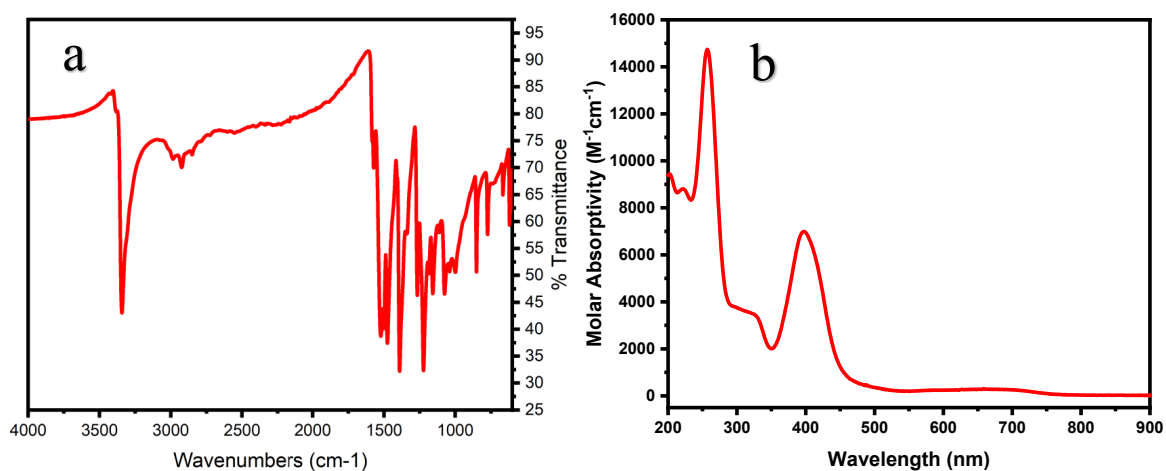

**Figure S2.** a) FT-IR spectrum of Ni-ATSM b) UV-visible spectra of Ni-ATSM in acetonitrile.

Ni-ATSM

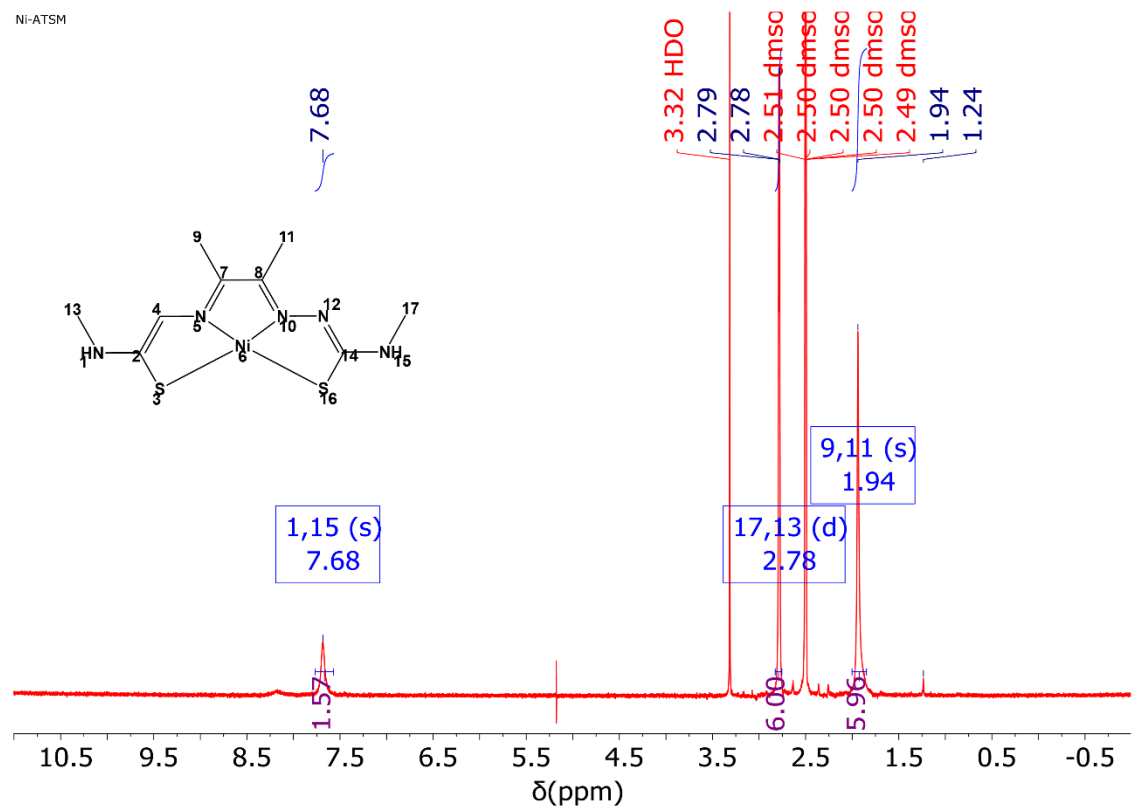

**Figure S3.**  $^1\text{H}$  NMR of Ni-ATSM in DMSO- $\text{D}_6$  (500MHz,  $\delta$  7.68 (s, 2H),  $\delta$  2.78 (d,  $J = 4.8$  Hz, 6H),  $\delta$  1.94(s, 6H)).

**Table S1.** Tafel slope and overpotential of different carbon substrates at  $-10$  mA/cm $^2$ .

|           | Overpotential | Tafel slope<br>mV/decade |
|-----------|---------------|--------------------------|
| Blank GCE | >900          | 140                      |
| Blank CPE | >900          | 130                      |
| Blank HB  | 730           | 190                      |
| Blank 2B  | 743           | 192                      |
| Blank 4B  | 751           | 220                      |
| Blank 8B  | 748           | 186                      |

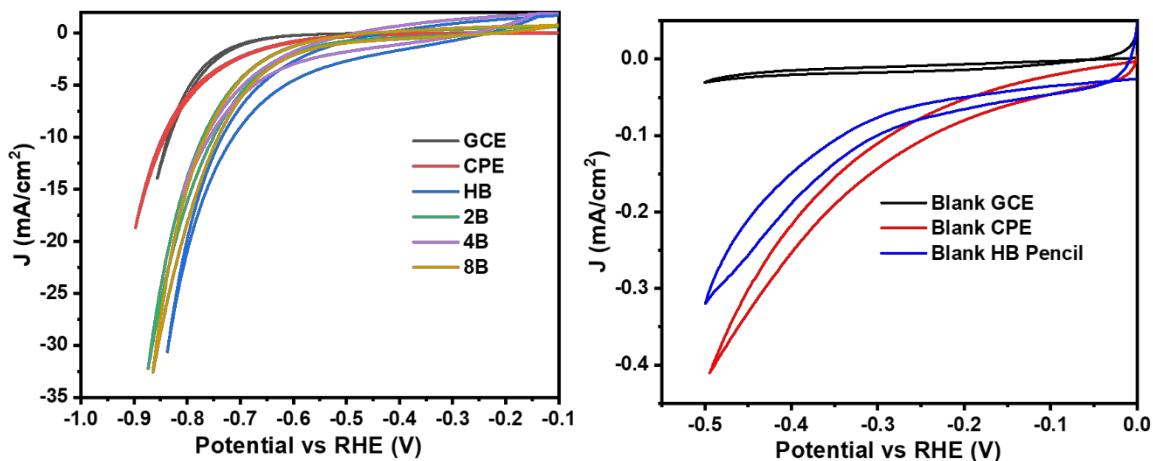

**Figure S4.** Cyclic voltammograms for carbon supports in 0.5 M H<sub>2</sub>SO<sub>4</sub> from -0.1 to -1.0 V vs RHE (left) and for GCE, CPE, and HB pencil from 0 to -0.5 V in 0.5 M H<sub>2</sub>SO<sub>4</sub> (right) (Scan rate 100 mV/s).

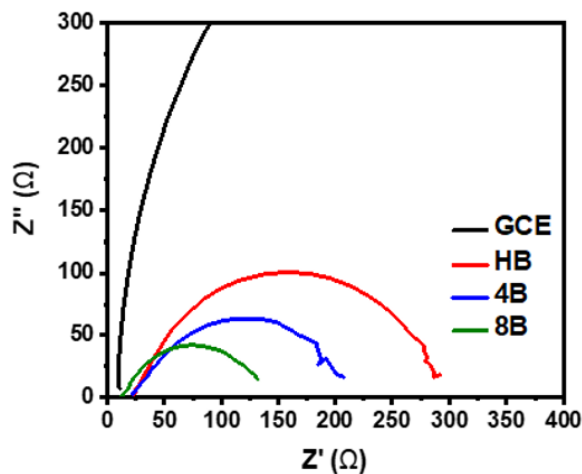

**Figure S5.** Nyquist plot of different grade of pencils in comparison with glassy carbon electrode.

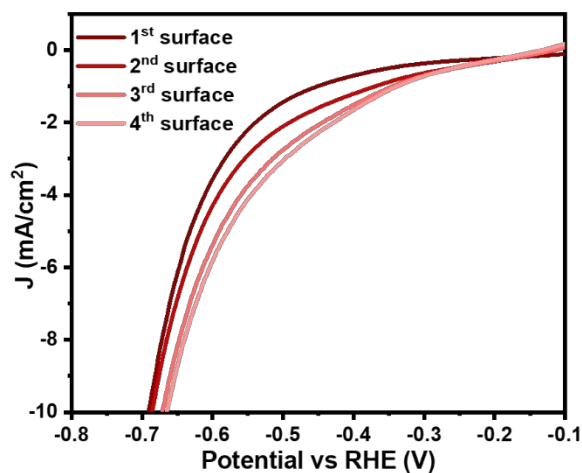

**Figure S6.** LSV plot of different surface of pencils generated using table saw in 0.5 M H<sub>2</sub>SO<sub>4</sub> from -0.1 to -0.8 V vs RHE.

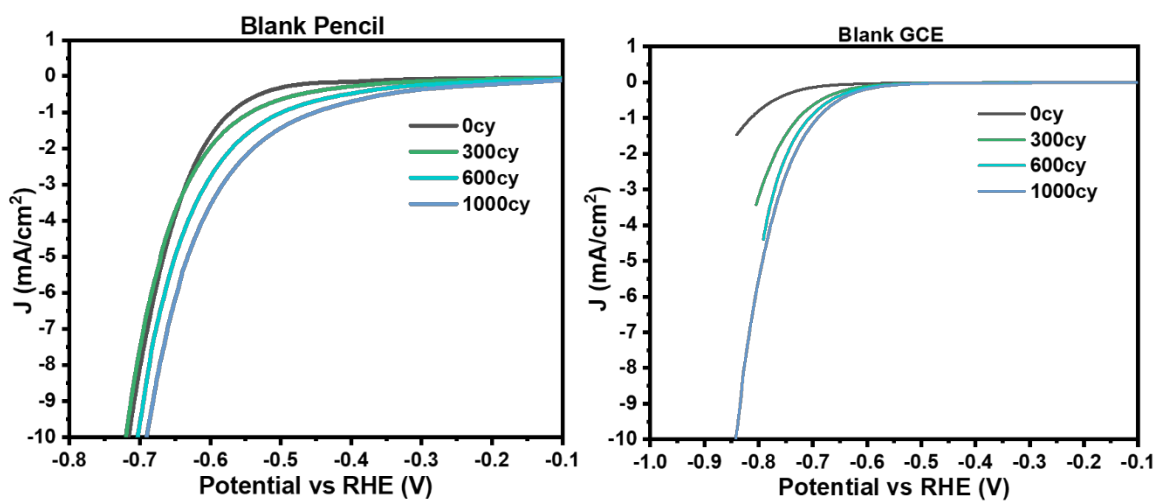

**Figure S7.** LSV of pencil surface (left) and GCE surface (right) after each 300 reductive cycling.

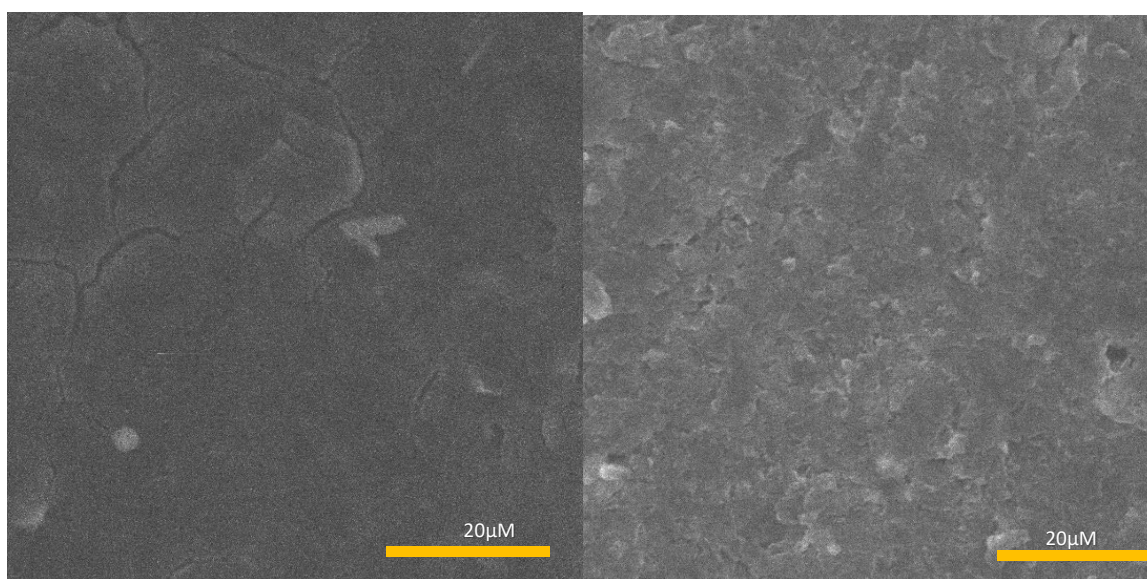

**Figure S8.** SEM image of pencil before (left) and after (right) 1000 reductive cycling.

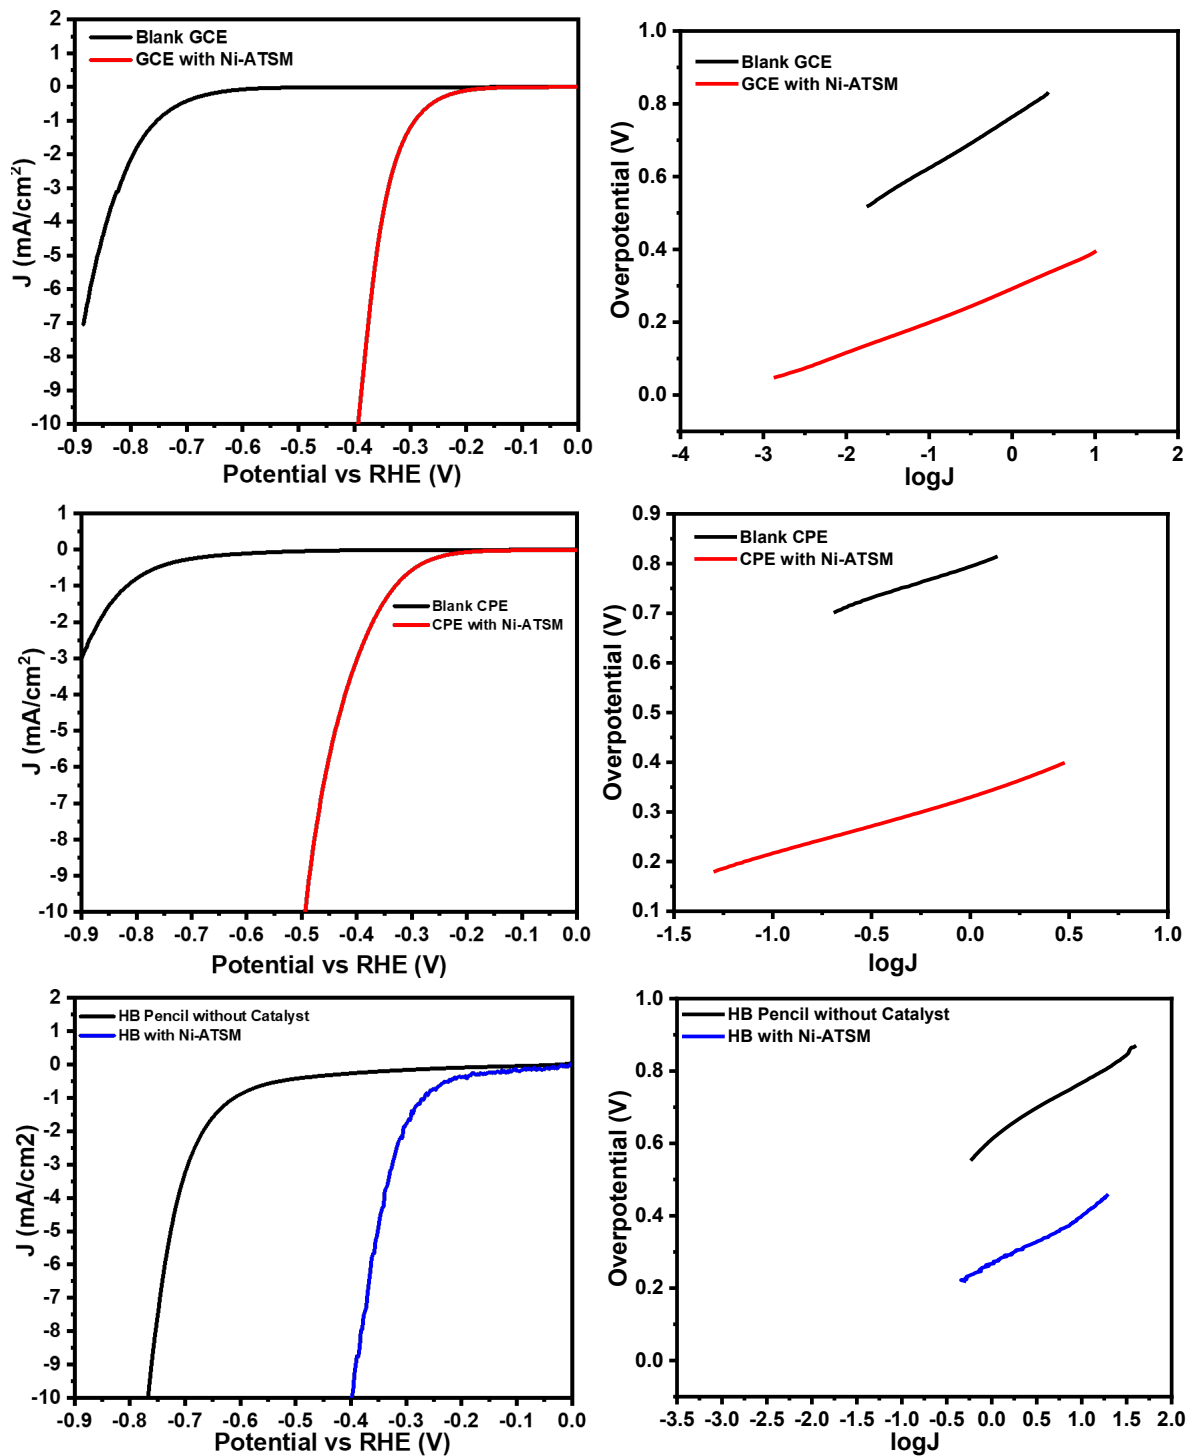

**Figure S9.** LSV and Tafel plots of the the carbon supports GCE, CPE, and HB, with and without catalyst.

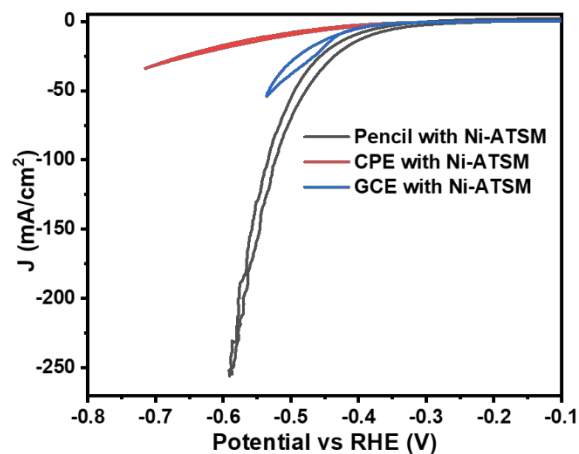

**Figure S10.** Cyclic voltammograms for Ni-ATSM on GCE, CPE, and HB pencil in 0.5 M H<sub>2</sub>SO<sub>4</sub> from -0.1 to -0.8 V vs RHE at a scan rate of 100 mV/s.

**Table S2.** Tafel slope and overpotential (at -10 mA/cm<sub>2</sub>) of catalyst loaded carbon surfaces.

|                          | Over potential (mV) | Tafel slope |
|--------------------------|---------------------|-------------|
| PGE with catalyst        | 400                 | 137         |
| GCE with catalyst        | 393                 | 90          |
| CPE with catalyst        | 493                 | 118         |
| Etched PGE with catalyst | 354                 | 116         |
| Platinum                 | 61                  | 29          |

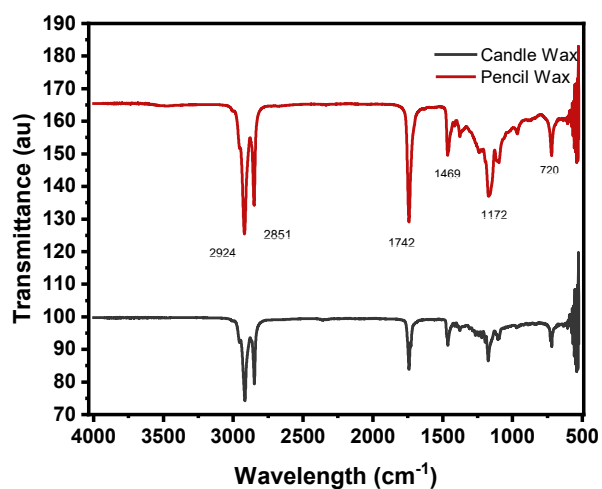

**Figure S11.** IR spectra of wax obtained from HB pencil by acetone extraction compared to candle wax.



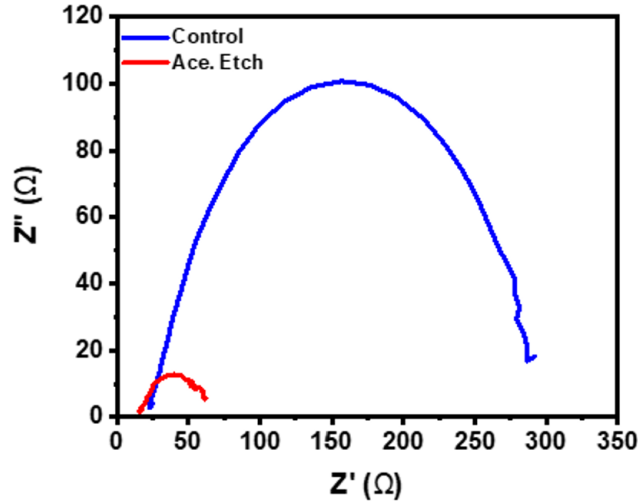

**Figure S12.** Nyquist plots for the HB Pencil Before and after etching.

### Measurement of relative electrochemically active surface area

$$|I_p| = 0.4463nAF C_{bulk} \left( \frac{nF_s D_A}{RT} \right)^{1/2}$$

Capacitance measurement method was used to determine the relative increase in electrochemically active surface area of the pencil after etching with acetone. For this cyclic voltammetry (CV) was utilized. Ag/Ag<sup>+</sup> was used as reference electrode, graphite rod as counter and pencil graphite before or after etching as working electrode. CV of the unetched pencil and the same pencil after etching with acetone was taken in 0.5 M H<sub>2</sub>SO<sub>4</sub> in small constant potential window in non-faradaic region using different scan rates (10, 20, 30, 40, 50 mV/s). CV was plotted and the area under the curve of CV was determined which can be correlated to the current used for charging the electrical double layer. This integrated current can be correlated to the surface area of electrode using following equation. When potential window is same and scan rate is same, increase in current can be related to increase in surface area of the electrode. Therefore, ratio of the current after and before etching with acetone will give the relative increase in the surface area after etching. Table S3 below shows the calculated values of ratio of capacitance after and before etching which can be correlated to the relative increase in surface area after etching.

**Table S3.** Calculation of relative surface area of acetone etched pencil

| Blank Pencil |                           | Acetone Etched Pencil |                           | Ratio of Charge |
|--------------|---------------------------|-----------------------|---------------------------|-----------------|
| Scan rate    | Area under curve (Charge) | Scan rate             | Area under curve (Charge) |                 |
| 20           | 6.84E-08                  | 20                    | 1.31E-07                  | 1.91            |
| 30           | 8.03E-08                  | 30                    | 1.99E-07                  | 2.48            |
| 40           | 1.53E-07                  | 40                    | 2.95E-07                  | 1.93            |
| 50           | 1.85E-07                  | 50                    | 4.91E-07                  | 2.65            |

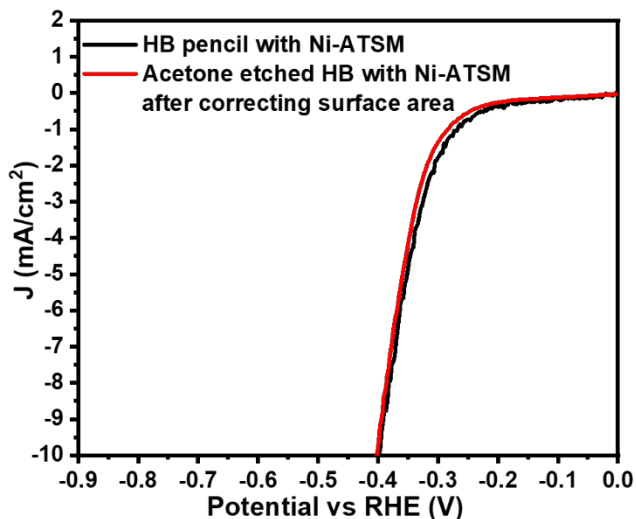**Figure S13.** LSV catalyst modified pencil and surface area corrected acetone etched pencil with catalyst.

A reproducibility test was done with acetone etched pencil. In this test acetone etched pencil was used to drop cast catalyst and study HER activity. Catalyst modified etched pencil was cleaned by sonicating in acetone for half an hour and catalyst was drop casted on the surface again to study the HER activity. Figure S8 shows that there is not any substantial change in the overpotential of the catalyst modified etched pencil or etched pencil substrate when used again after cleaning.

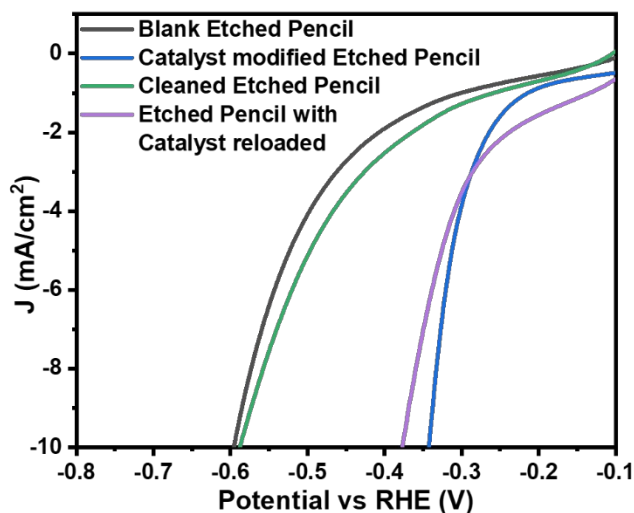

**Figure S14.** Reproducibility test of acetone etched pencil.

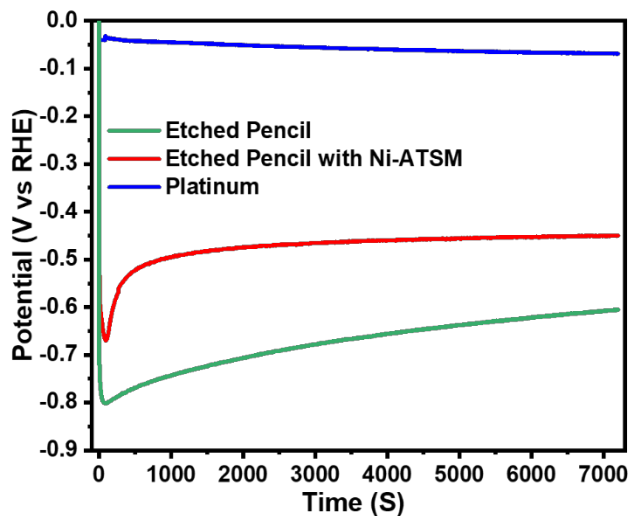

**Figure S15.** Chronopotentiometry at  $-10 \text{ mA/cm}^2$  of etched pencil, catalyst modified etched pencil, and platinum.

**Table S4.** Faradaic efficiency of platinum, acetone etched pencil and catalyst modified acetone etched pencil for HER

| S.N. | Surface                            | Faradaic Efficiency for HER (%) |
|------|------------------------------------|---------------------------------|
| 1    | Platinum                           | $100 \pm 4$                     |
| 2    | Acetone etched pencil              | $93 \pm 3$                      |
| 3    | Acetone etched pencil with Ni-ATSM | $96 \pm 6$                      |
